# Supplementary material for: Two isostructural Ln3+-based heterometallic MOFs for the detection of nitro-aromatics and Cr2O72−
Source: Royal Society of Chemistry journal article supplement (doi:10.1039/d0nj02869j), 2020-01-01
Supplement: d0nj02869j1.pdf [file d0nj02869j1.pdf]

**Two isostructural Ln<sup>3+</sup>-based heterometallic MOFs for the detection  
of nitro-aromatic and Cr<sub>2</sub>O<sub>7</sub><sup>2-</sup>**

*Yuxiao Zhang, Yiting Ying, Meng Feng, Liang Wu, Dongmei Wang\* and Chunxia Li\**

*Key Laboratory of the Ministry of Education for Advanced Catalysis Materials,  
College of Chemistry and Life Sciences, Zhejiang Normal University, Jinhua 321004,  
P. R. China. E-mail: [dmwang@zjnu.edu.cn](mailto:dmwang@zjnu.edu.cn), [cxli@zjnu.edu.cn](mailto:cxli@zjnu.edu.cn).*

### Calculation procedures of fluorescence quenching efficiency

The fluorescence quenching efficiency of **In/Eu-CBDA** and **In/Tb-CBDA** can be evaluated by the Stern-Volmer constant ( $K_{sv}$ ), which is calculated by using the Stern-Volmer equation:

$$I_0/I = 1 + K_{sv}[M]$$

( $I_0$  = the initial luminescence intensity,  $I$  = the luminescence intensity after the addition of the analytes,  $[M]$  = the concentration of the analytes and  $K_{sv}$  = the Stern-Volmer constant).

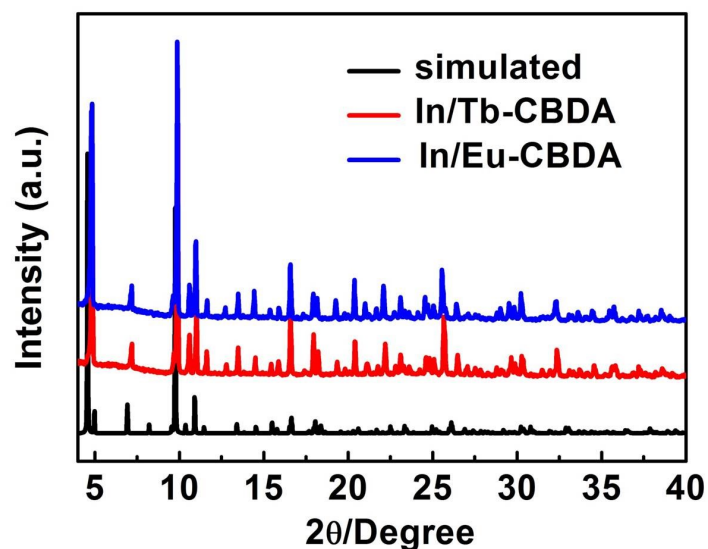

**Fig. S1** Powder XRD spectra of **In/Tb-CBDA**, **In/Eu-CBDA** and single crystal structures.

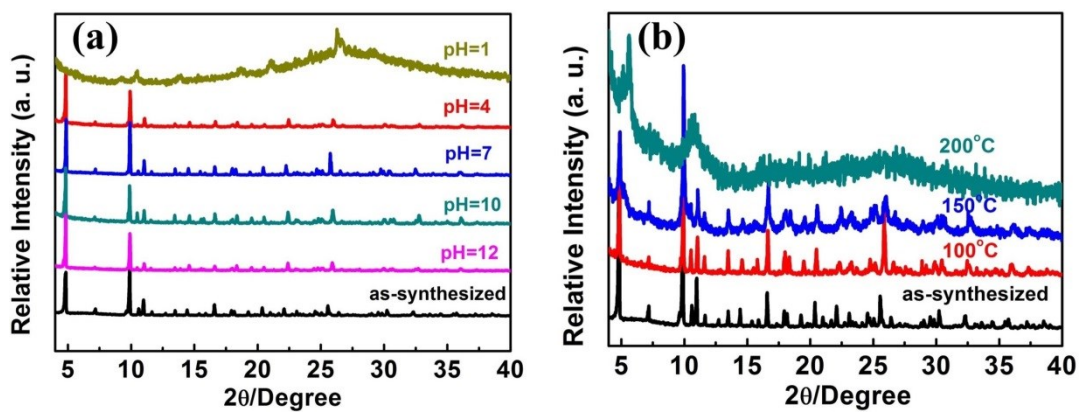

Fig. S2 PXRD patterns for **In/Eu-CBDA** samples (a) at different pH and (b) at variable temperatures.

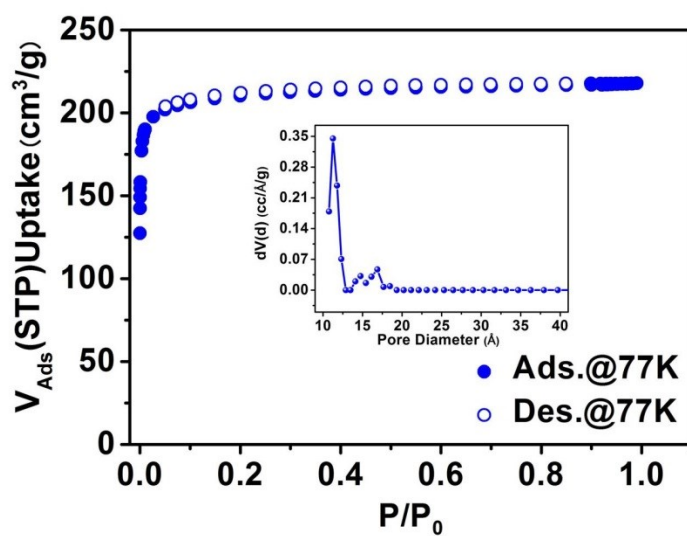

Fig. S3 Sorption isotherm and pore size distribution of **In/Eu-CBDA** at 77 K.

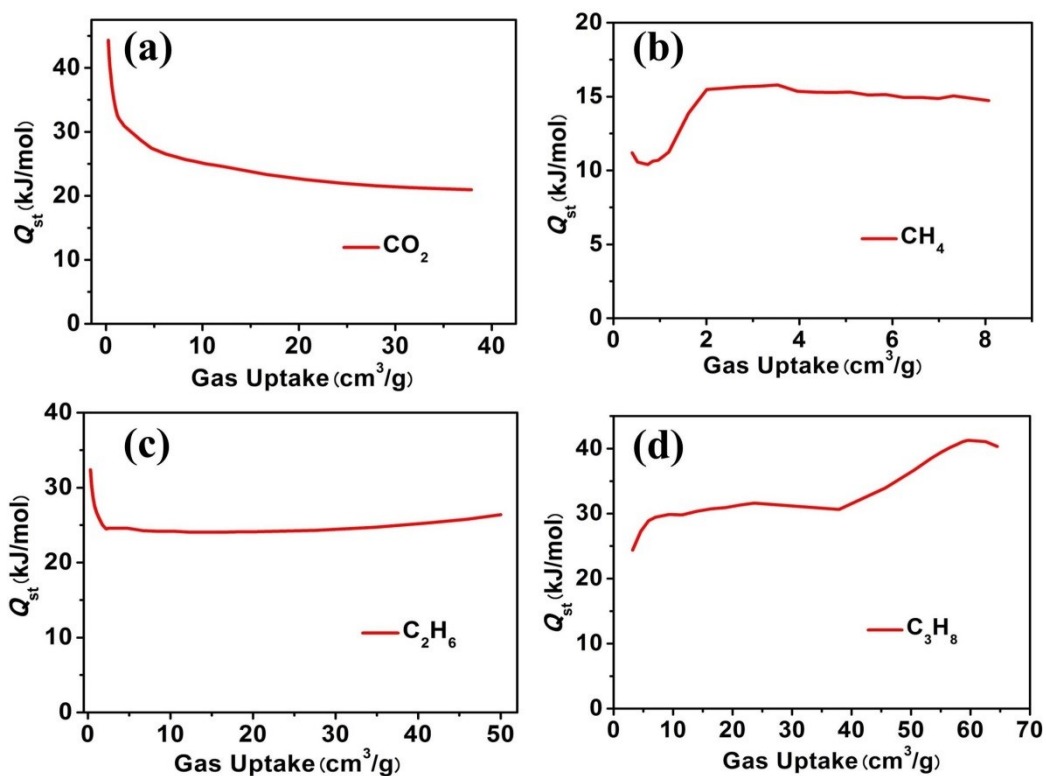

**Fig. S4** Isosteric heat of  $\text{CO}_2$  (a),  $\text{CH}_4$  (b),  $\text{C}_2\text{H}_6$  (c), and  $\text{C}_3\text{H}_8$  (d) for **In/Eu-CBDA**.

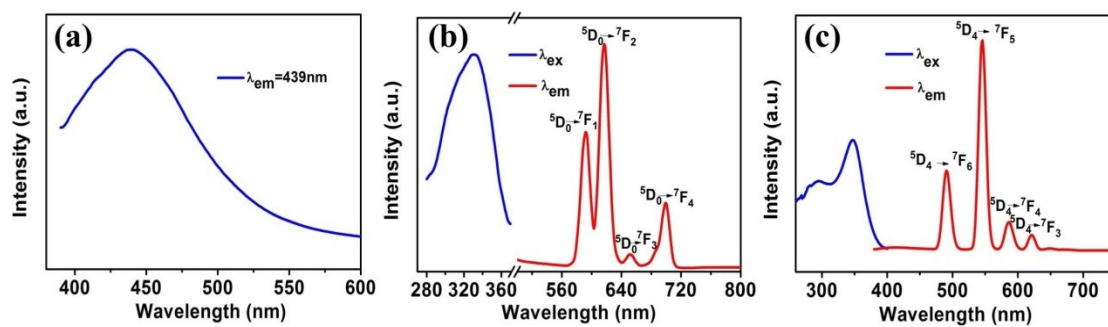

**Fig. S5** Excitation and emission spectra of (a) CBDA (b) **In/Eu-CBDA** and (c) **In/Tb-CBDA**.

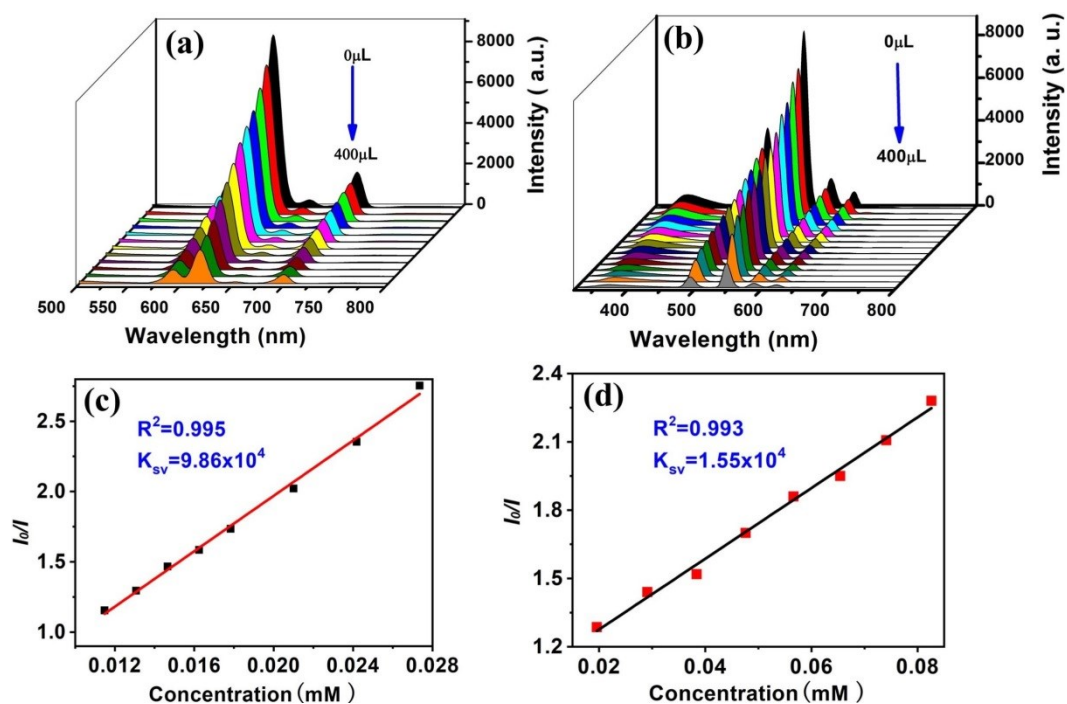

**Fig. S6** (a) and (b) are the fluorescence spectra of 1,4-dinitrobenzene for **In/Eu-CBDA** and **In/Tb-CBDA** at different concentrations; (c) and (d) are the Stern-Volmer (SV) spectrum of 1,4-dinitrobenzene for **In/Eu-CBDA** and **In/Tb-CBDA**.

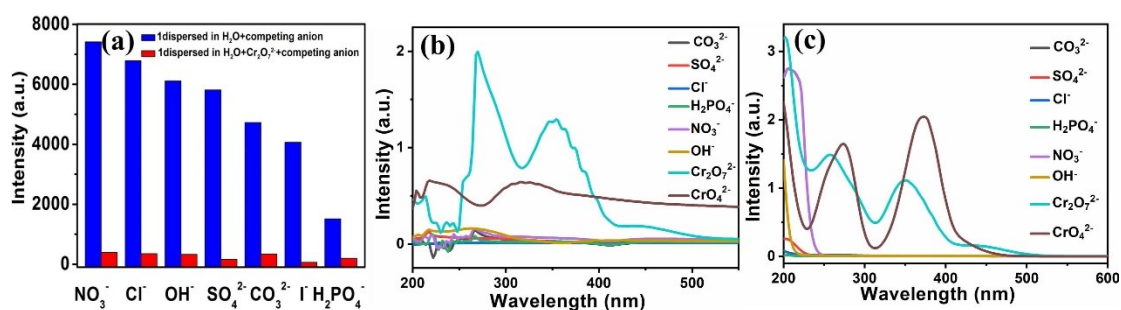

**Fig. S7** (a) Fluorescence intensity spectrogram of **In/Tb-CBDA** in aqueous solution containing different competing ions and fluorescence intensity spectrum after adding  $\text{Cr}_2\text{O}_7^{2-}$ . UV-Vis absorption spectra of (b) **In/Eu-CBDA** and (c) **In/Tb-CBDA** in DMF solutions with different potassium anions.

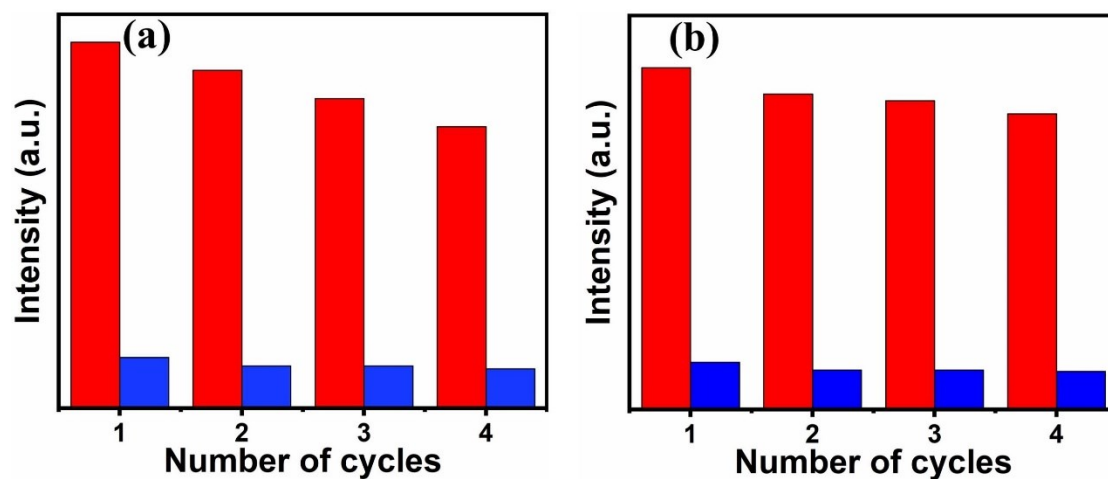

Fig. S8 The reproducibility of the quenching ability of (a) **In/Eu-CBDA** and (b) **In/Tb-CBDA** on  $\text{Cr}_2\text{O}_7^{2-}$ .

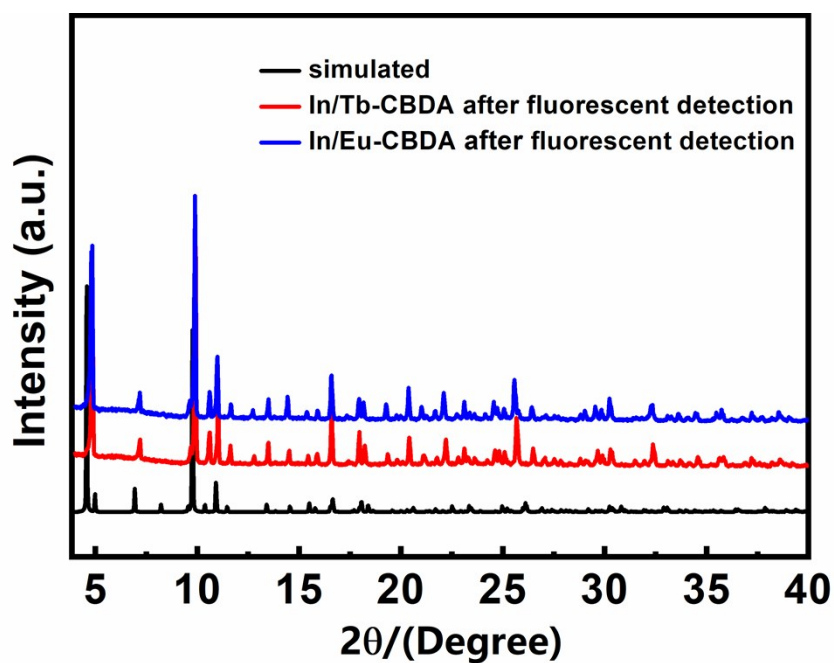

Fig. S9 The powder XRD patterns for **In/Eu-CBDA** and **In/Tb-CBDA** after fluorescent detection.

**Table S1** Comparison of detection ability on representative MOFs towards Cr<sub>2</sub>O<sub>7</sub><sup>2-</sup>.

| Materials                                                                                                               | Ksv (M <sup>-1</sup> ) | Detection limit (ppb) | Solvent | Reference |
|-------------------------------------------------------------------------------------------------------------------------|------------------------|-----------------------|---------|-----------|
| In/Eu-CBDA                                                                                                              | 1.08×10 <sup>4</sup>   | 2.15×10 <sup>8</sup>  | DMF     | This work |
| In/Tb-CBDA                                                                                                              | 1.72×10 <sup>4</sup>   | 8.72×10 <sup>6</sup>  | water   | This work |
| Zn-MOF-1                                                                                                                | 2.07×10 <sup>4</sup>   | 3.53×10 <sup>6</sup>  | water   | [1]       |
| [Zn <sub>2</sub> (TPOM)(NH <sub>2</sub> -BDC) <sub>2</sub> ]·4H <sub>2</sub> O                                          | 7.59×10 <sup>3</sup>   | 3.90×10 <sup>6</sup>  | DMF     | [2]       |
| [Cd(L)(TPOM) <sub>0.75</sub> ]·xS                                                                                       | 1.35×10 <sup>4</sup>   |                       | water   | [3]       |
| [Zn(L)(BBI)·(H <sub>2</sub> O) <sub>2</sub> ]                                                                           | 1.17×10 <sup>4</sup>   |                       | water   | [3]       |
| [Eu(Hpzbc) <sub>2</sub> (NO <sub>3</sub> ) <sub>3</sub> ]·H <sub>2</sub> O                                              |                        | 2.20×10 <sup>7</sup>  | ethanol | [4]       |
| [Zn <sub>2</sub> (TPOM)(NDC) <sub>2</sub> ]·3.5H <sub>2</sub> O                                                         | 9.21×10 <sup>3</sup>   | 2.35×10 <sup>6</sup>  | water   | [5]       |
| 534-MOF-Tb                                                                                                              | 1.37×10 <sup>4</sup>   | 1.40×10 <sup>8</sup>  | water   | [6]       |
| Eu <sup>3+</sup> @MIL-121                                                                                               | 4.34×10 <sup>3</sup>   | 5.40×10 <sup>4</sup>  | water   | [7]       |
| [Zn <sub>7</sub> (TPPE) <sub>2</sub> (SO <sub>4</sub> <sup>2-</sup> ) <sub>7</sub> ](DMF·H <sub>2</sub> O)              | 1.09×10 <sup>4</sup>   | 26.98                 | water   | [8]       |
| [Tb(TATAB)(H <sub>2</sub> O) <sub>2</sub> ]·NMP                                                                         | 1.11×10 <sup>4</sup>   |                       | water   | [9]       |
| [Zn <sub>3</sub> (tza) <sub>2</sub> (μ <sub>2</sub> -OH) <sub>2</sub> (H <sub>2</sub> O) <sub>2</sub> ]H <sub>2</sub> O | 5.02×10 <sup>3</sup>   | 1.00×10 <sup>6</sup>  | water   | [10]      |
| [Zn(btz)] <sub>n</sub>                                                                                                  | 3.19×10 <sup>3</sup>   | 5.20×10 <sup>2</sup>  | water   | [11]      |
| [Zn <sub>2</sub> (tz)H <sub>2</sub> O] <sub>n</sub>                                                                     | 2.19×10 <sup>3</sup>   | 1.04×10 <sup>3</sup>  | water   | [11]      |
| [Eu(ipbp) <sub>2</sub> (H <sub>2</sub> O) <sub>3</sub> ]Br·6H <sub>2</sub> O                                            | 8.98×10 <sup>3</sup>   | 5.16×10 <sup>9</sup>  | water   | [12]      |
| [Eu <sub>7</sub> (mtb) <sub>5</sub> (H <sub>2</sub> O) <sub>16</sub> ]·NO <sub>3</sub> ·8DMA·18H <sub>2</sub> O         | 3.34×10 <sup>4</sup>   | 0.56                  | water   | [13]      |
| [Zn <sub>3</sub> (bpanth)(oba) <sub>3</sub> ]·2DMF                                                                      | 9.40×10 <sup>4</sup>   | 7.00×10 <sup>2</sup>  | water   | [14]      |
| Zr <sub>6</sub> O <sub>4</sub> (OH) <sub>7</sub> (H <sub>2</sub> O) <sub>3</sub> (BTBA) <sub>3</sub>                    | 1.57×10 <sup>4</sup>   | 1.50×10 <sup>6</sup>  | water   | [15]      |

- (1) X.-Y. Guo, F. Zhao, J.-J. Liu, Z.-L. Liu and Y.-Q. Wang, *J. Mater. Chem. A*, 2017, **5**, 20035-20043.
- (2) R. Lv, J. Wang, Y. Zhang, H. Li, L. Yang, S. Liao, W. Gu and X. Liu, *J. Mater. Chem. A*, 2016, **4**, 15494-15500.
- (3) Y. Zhao, X. Xu, L. Qiu, X. Kang, L. Wen and B. Zhang, *ACS Appl Mater. Interfaces*, 2017, **9**, 15164-15175.
- (4) G.-P. Li, G. Liu, Y.-Z. Li, L. Hou, Y.-Y. Wang and Z. Zhu, *Inorg. Chem.*, 2016, **55**, 3952-3959.
- (5) R. Lv, H. Li, J. Su, X. Fu, B. Yang, W. Gu and X. Liu, *Inorg. Chem.*, 2017, **56**, 12348-12356.
- (6) M. Chen, W.-M. Xu, J.-Y. Tian, H. Cui, J.-X. Zhang, C.-S. Liu and M. Du, *J. Mater. Chem. C*, 2017, **5**, 2015-2021.
- (7) J.-N. Hao and B. Yan, *New J. Chem.*, 2016, **40**, 4654-4661.
- (8) X.-X. Wu, H.-R. Fu, M.-L. Han, Z. Zhou and L.-F. Ma, *Cryst. Growth Des.*, 2017, **17**, 6041-6048.
- (9) G.-X. Wen, M.-L. Han, X.-Q. Wu, Y.-P. Wu, W.-W. Dong, J. Zhao, D.-S. Li and L.-F. Ma, *Dalton Trans.*, 2016, **45**, 15492-15499.

- (10) T.-Q. Song, J. Dong, H.-L. Gao, J.-Z. Cui and B. Zhao, *Dalton Trans.*, 2017, **46**, 13862-13868.
- (11) C.-S. Cao, H.-C. Hu, H. Xu, W.-Z. Qiao and B. Zhao, *CrystEngComm*, 2016, **18**, 4445-4451.
- (12) C. Zhang, L. Sun, Y. Yan, H. Shi, B. Wang, Z. Liang and J. Li, *J. Mater. Chem. C*, 2017, **5**, 8999-9004.
- (13) W. Liu, Y. Wang, Z. Bai, Y. Li, Y. Wang, L. Chen, L. Xu, J. Diwu, Z. Chai and S. Wang, *ACS Appl Mater. Interfaces*, 2017, **9**, 16448-16457.
- (14) Z.-Q. Yao, G.-Y. Li, J. Xu, T.-L. Hu and X.-H. Bu, *Chem. Eur. J.*, 2018, **24**, 3192-3198.
- (15) T. He, Y.-Z. Zhang, X.-J. Kong, J. Yu, X.-L. Lv, Y. Wu, Z.-J. Guo and J.-R. Li, *ACS Appl Mater. Interfaces*, 2018, **10**, 16650-16659.
